# Supplementary material for: Effectiveness of Digital Counseling Environments on Anxiety, Depression, and Adherence to Treatment Among Patients Who Are Chronically Ill: Systematic Review
Source: J Med Internet Res. 2022 Jan 6;24(1):e30077. doi: 10.2196/30077 (PMC8778552; doi:10.2196/30077)
Supplement: Multimedia Appendix 2 [file jmir_v24i1e30077_app2.docx]

| Study | Criteria | | | | | | | | | | | | | Score out of 13 |
| --- | --- | --- | --- | --- | --- | --- | --- | --- | --- | --- | --- | --- | --- | --- |
|  | Randomizationa | Concealed allocation from groupsb | Similarity in treatment groupsc | Blinding of participantsd | Blinding of those delivering treatmente | Blinding of outcomes assessorsf | Identical treatment of groupsg | Complete follow-uph | Intention-to-treat analysisi | Similarity in outcome measurementsj | Reliability of outcome measurementsk | Appropriate statistical analysisl | Appropriate trial designm |  |
|  | | | | | | | | | | | | | | |
| Børøsund et al [53] | Yes | Yes | Yes | No | Yes | Yes | Yes | Yes | Yes | Yes | Yes | Yes | Yes | 12 |
| Choi et al [54] | Yes | Ucn | Yes | Uc | Uc | Uc | Yes | Yes | Yes | Yes | Yes | Yes | Yes | 9 |
| Elkjaer et al [55] | Yes | Yes | Yes | Yes | Yes | No | Yes | Yes | Yes | Yes | Yes | Yes | Yes | 12 |
| Foley et al [73] | Yes | Uc | Yes | Uc | Uc | Uc | Yes | Yes | No | Yes | Yes | Yes | Yes | 9 |
| Greer et al [69] | Yes | No | Yes | No | Uc | Yes | Yes | Yes | Uc | Yes | Yes | Yes | Yes | 9 |
| Guo et al [74] | Yes | No | Yes | No | No | Yes | Yes | Yes | Uc | Yes | Yes | Yes | Yes | 9 |
| Habibovic et al [56] | Yes | Yes | Yes | No | No | Yes | Yes | Yes | Yes | Yes | Yes | Yes | Yes | 11 |
| Handa et al [70] | Yes | No | Yes | No | No | No | Yes | Yes | Yes | Yes | Yes | Yes | Yes | 9 |
| Helzlsouer et al [75] | Yes | Yes | Yes | No | No | Uc | Yes | Yes | Uc | Yes | Yes | Yes | Yes | 9 |
| Keyserling et al [57] | Yes | Uc | Yes | Uc | Uc | Uc | Yes | Yes | Uc | Yes | Yes | Yes | Yes | 8 |
| Kim et al [58] | Yes | No | Yes | Yes | No | Uc | Yes | Yes | Uc | Yes | Yes | Yes | Yes | 9 |
| Lambert et al [59] | Yes | Yes | Yes | No | No | Yes | Yes | Yes | Yes | Yes | Yes | Yes | Yes | 11 |
| Liu et al [68] | Yes | No | Yes | No | No | Yes | Yes | N/Ao | No | Yes | Yes | Yes | Yes | 8 |
| Liu et al [72] | Yes | No | Yes | Yes | Yes | Uc | Yes | Yes | Yes | Yes | Yes | Yes | Yes | 11 |
| Mata et al [60] | Yes | Yes | Yes | No | Yes | Yes | Yes | Yes | Yes | Yes | Yes | Yes | Yes | 12 |
| Persell et al [67] | Yes | Yes | Yes | No | No | No | Yes | Yes | Yes | Yes | Yes | Yes | Yes | 10 |
| Petzel et al [76] | Yes | Yes | Yes | Yes | Yes | Uc | Yes | Uc | No | Yes | Yes | Yes | Yes | 10 |
| Sharara et al [61] | Yes | Uc | Yes | No | Uc | Yes | Yes | Yes | Uc | Yes | Yes | Yes | Yes | 9 |
| Strøm et al [62] | Yes | Yes | Uc | No | No | No | Yes | Yes | No | Yes | Yes | Yes | Yes | 9 |
| Urech et al [66] | Yes | Uc | Yes | No | No | Uc | Yes | Yes | Yes | Yes | Yes | Yes | Yes | 10 |
| White et al [63] | Yes | Uc | Yes | No | Uc | Uc | Yes | Yes | Yes | Yes | Yes | Yes | Yes | 9 |
| Widmer et al [64] | Yes | Uc | Yes | No | No | Yes | Yes | Yes | Uc | Yes | Yes | Yes | Yes | 9 |
| Yun et al [65] | Yes | No | Yes | Uc | Uc | Uc | Yes | Yes | Yes | Yes | Yes | Yes | Yes | 9 |
| Yu et al [71] | Yes | No | Yes | No | No | No | Yes | Yes | Yes | Yes | Yes | Yes | Yes | 9 |

aWas true randomization used for assignment of participants to treatmentgroups?

bWas allocation to treatment groups concealed?

cWere treatment groups similar at the baseline?

dWere participants blind to treatment assignment?

eWere those delivering treatment blind to treatment assignment?

fWere outcomes assessors blind to treatment assignment?

gWere treatment groups treated identically other than the intervention ofinterest?

hWas follow-up complete, and if not, were differences between groups interms of their follow-up adequately described and analyzed?

iWere participants analyzed in the groups to which they were randomized?

jWere outcomes measured in the same way for treatment groups?

kWere outcomes measured in a reliable way?

lWas appropriate statistical analysis used?

mWas the trial design appropriate, and were any deviations from the standard randomized controlled trial design (individual randomization and parallel groups) accounted for in the conduct and analysis of the trial?

nUc: unclear.

oN/A: not applicable.
